# Supplementary material
Source: PubMed Central journal article supplement (PMC7895329)

## **Itacitinib (INCB039110) for the Prevention of Cytokine Release Syndrome Induced by CAR T-Cell Therapy**

Eduardo Huarte<sup>1</sup>, Roddy S. O'Connor<sup>2,3</sup>, Michael T. Peel<sup>1</sup>, Selene Nunez-Cruz<sup>2,3</sup>, John Leferovich<sup>2,3</sup>, Ashish Juvekar<sup>1</sup>, Yan-ou Yang<sup>1</sup>, Lisa Truong<sup>1</sup>, Taisheng Huang<sup>1</sup>, Ahmad Naim<sup>4</sup>, Michael C. Milone<sup>2,3</sup>, and Paul A. Smith<sup>1</sup>

<sup>1</sup>Incyte Research Institute, Wilmington, Delaware. <sup>2</sup>Department of Pathology and Laboratory Medicine, Perelman School of Medicine, University of Pennsylvania, Philadelphia, Pennsylvania. <sup>3</sup>Center for Cellular Immunotherapies, Perelman School of Medicine, University of Pennsylvania, Philadelphia, Pennsylvania. <sup>4</sup>Incyte Corporation, Wilmington, Delaware.

### **Supplementary Data**

### Supplementary Figure S1.

Itacitinib reduces cytokine levels in murine models of acute inflammation. **(A)** BALB/c mice were orally dosed with vehicle control, 60 or 120 mg/kg of itacitinib. One hour later animals were challenged with an anti-CD3 antibody, and 120 minutes later sacrificed and plasma collected (prophylactic). **(B)** BALB/c mice were challenged with an anti-CD3 antibody, 30 minutes later were orally dosed with vehicle control, 60 or 120 mg/kg of itacitinib, and 2 hours after anti-CD3 challenge sacrificed (therapeutic). N=5 animals per group. MSD analysis was performed to detect the levels of pro-inflammatory cytokines. Data represent mean + SEM, and P values were calculated by two-way ANOVA. \* p<0.05, \*\*\* p<0.001. Data are representative of 2 independent experiments.

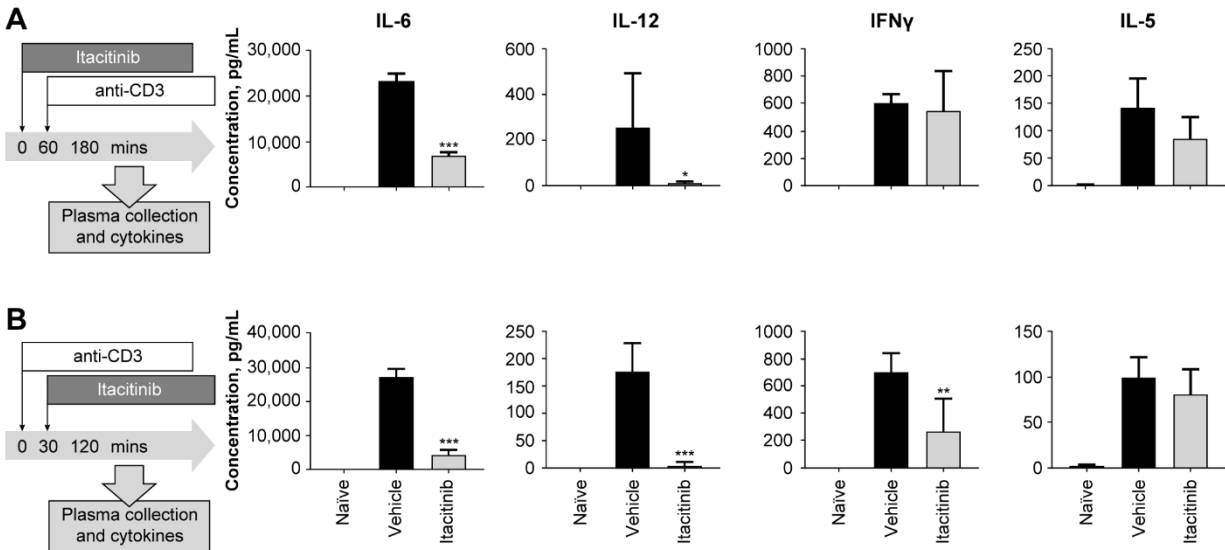

## Supplementary Figure S2.

**Itacitinib effect on cytokine production by macrophages.** C57BL/6 mice were prophylactically orally dosed with vehicle, or 60 or 120 mg/kg of itacitinib b.i.d. for 3 days. Mice then received intraperitoneal injections of LPS (5  $\mu$ g per animal). Two hours after injection, mice were euthanized and IL-1 $\beta$ , IL-10, IL-12p70, KC/GRO and TNF- $\alpha$  levels were measured in the peritoneal lavage. Data represent mean  $\pm$  SEM, and P values were calculated by two-way ANOVA. n.s., not significant. Data are representative of two independent experiments.

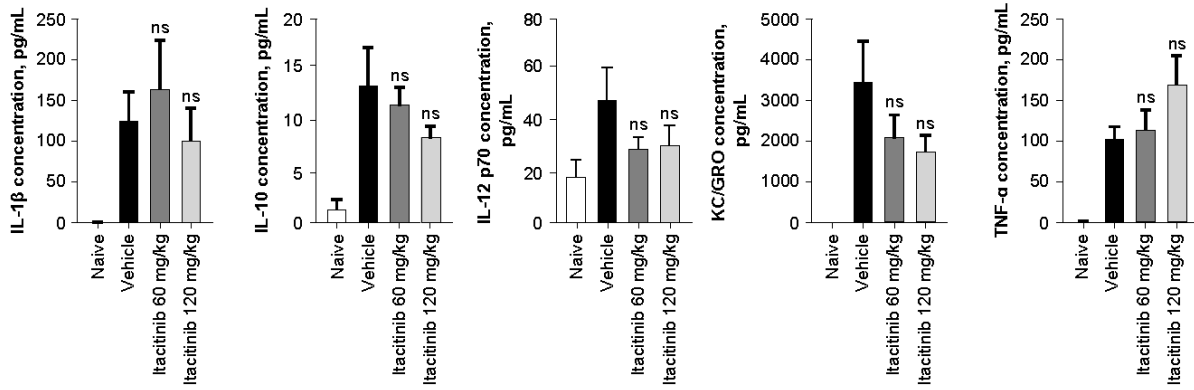

**Supplementary Figure S3.**

**Clinically relevant concentrations of itacitinib does not affect OT-1 nor EG7 proliferation.**

(A) OT-1 T-cells were expanded with the SIINFEKL peptide in the presence of increasing concentrations of itacitinib, and their expansion was measured by flow cytometry. Itacitinib concentrations relevant to the cellular  $IC_{50}$  or maximum free concentrations induced a modest reduction on T-cell proliferation. (B) EG7 tumor cell line was expanded in the presence of increasing itacitinib concentrations.

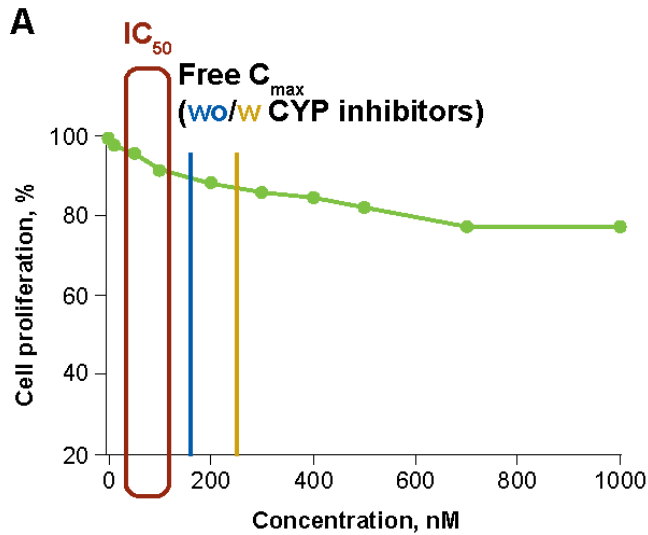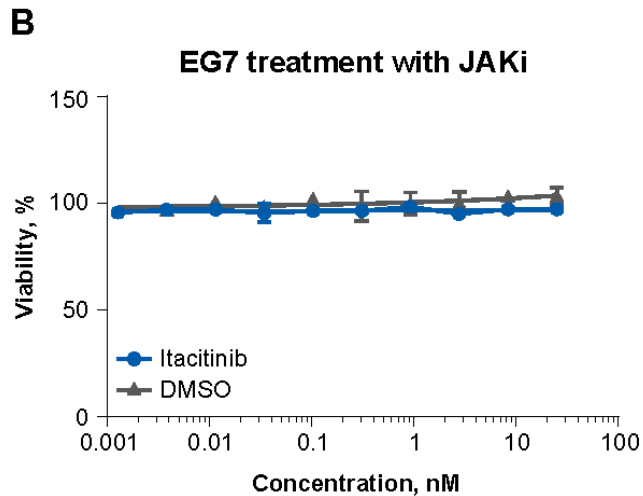

**Supplementary Figure S4.**

**Itacitinib does not affect CD19-CAR T-cell antitumor activity *in vivo*.** Immunodeficient NSG mice were inoculated with CD19<sup>+</sup> human lymphoma NAMALWA-luciferase cell line. Starting five days later, animals received twice daily doses of itacitinib or PBS for 10 days. At day 8 post-tumor injection, corresponding animals received an adoptive transfer of CD19-CAR T-cells. N=12 animals per group. Data representative of 2 independent experiments. (A) Experiment scheme. (B) Bioluminescence was measured once a week in anesthetized mice. (C) Survival curve.

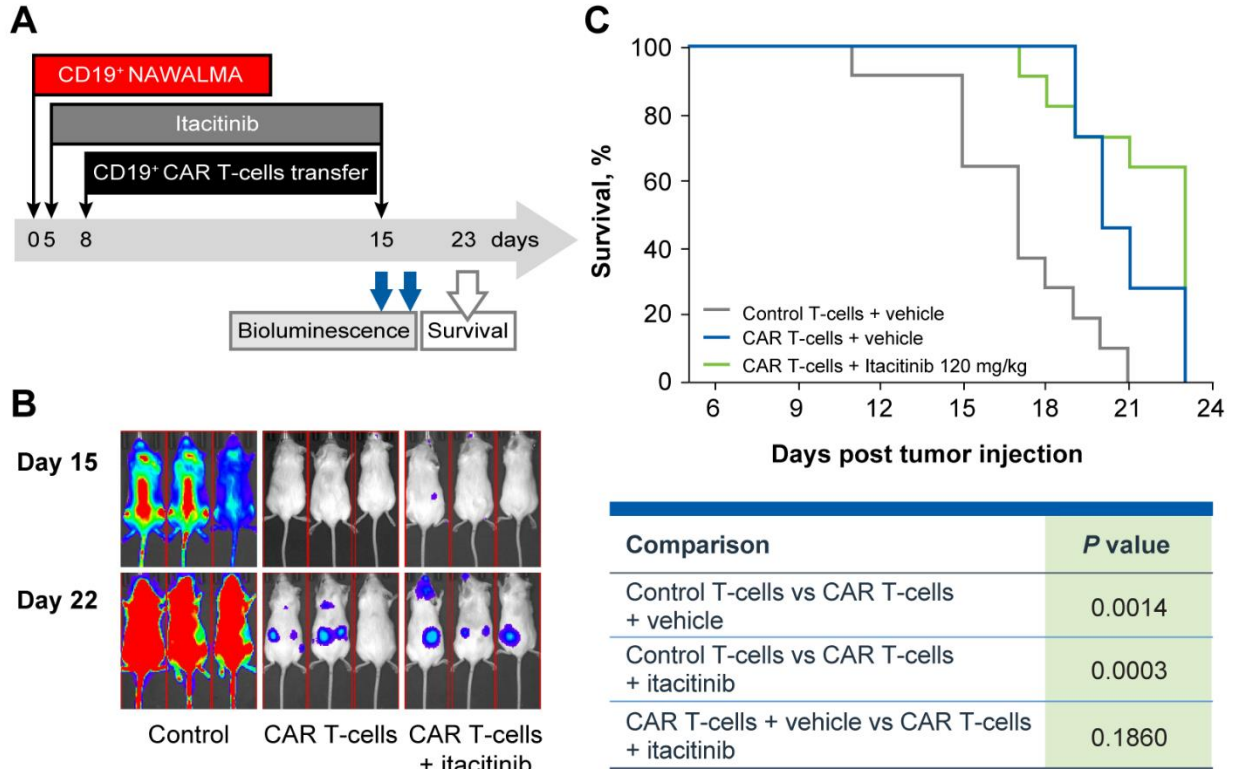

Supplement: NIHMS1666780-supplement-1.pdf [file NIHMS1666780-supplement-1.pdf]
